# Supplementary material
Source: Research Square preprint supplement (doi:10.21203/rs.3.rs-8742945/v1)
Supplement: Supplementary file 1 [file d588ef1193ad58d78e91a235.docx]

TABLE 1. Demographic and Clinical Characteristics of All the Patients

BMI, body mass index; MSU classification, Michigan State University classification of intervertebral disk herniation; OSE,one-hole split endoscopy; UBE,unilateral biportal endoscopy.

Values are presented as mean ± SD.

TABLE 2. Clinical Outcomes of OSE and UBE

ODI, Oswestry Disability Index; VAS, visual analog scale; OSE,one-hole split endoscopy; UBE,unilateral biportal endoscopy. a ,P < 0.05, statistically significant differences.

Values are presented as mean ± SD unless otherwise indicated.

TABLE 3. Comparison of Perioperative Date of OSE and UBE

OSE,one-hole split endoscopy; UBE,unilateral biportal endoscopy.

a ,P < 0.05, statistically significant differences.

Values are presented as mean ± SD unless otherwise indicated.

TABLE 4. Surgical Invasiveness and Radiographic Outcomes of OSE and UBE

PGE2, prostaglandin E2; TTR,transthyretin; ROM,range of motion; ST,sagittal translation; DHI,disc height index; MF,multifidus; ES,erector spinae; PS,psoas; RCSA,relative cross—sectional area; OSE,one-hole split endoscopy; UBE,unilateral biportal endoscopy.

a ,P < 0.05, statistically significant differences.

Values are presented as mean ± SD unless otherwise indicated.
